# Supplementary material
Source: PubMed Central journal article supplement (PMC3850188)
Supplement: supp_pp.113.222828_222828supp.pdf [file supp_pp.113.222828_222828supp.pdf]

|                 | CYP71D351 | CYP71D12 |
|-----------------|-----------|----------|
| <b>FD661166</b> | 100%      | 91%      |
| <b>FD660753</b> | 99%       | 91%      |
| <b>FD661225</b> | 100%      | 96%      |
| <b>FD662166</b> | 99%       | 91%      |

**Supplemental Table 1.** Nucleic acid sequence identity of the four T16H-annotated EST identified within the *C. roseus* epidermome EST database with *CYP71D351* and *CYP71D12* (Murata et al., 2008).

| <b>Compound</b>       | <b>Formula</b>                                                | <b>Calculated<br/>(m/z, [M+H])</b> | <b>Measured<br/>(m/z, [M+H])</b> | <b>Error<br/>(ppm)</b> |
|-----------------------|---------------------------------------------------------------|------------------------------------|----------------------------------|------------------------|
| 16-hydroxytabersonine | C <sub>21</sub> H <sub>24</sub> N <sub>2</sub> O <sub>3</sub> | 353,1860                           | 353,1850                         | 2.74                   |
| desacetoxyvindorosine | C <sub>22</sub> H <sub>28</sub> N <sub>2</sub> O <sub>3</sub> | 369,2173                           | 369,2176                         | 0.90                   |
| deacetylvindorosine   | C <sub>22</sub> H <sub>28</sub> N <sub>2</sub> O <sub>4</sub> | 385,2122                           | 385,2120                         | 0.48                   |
| vindorosine           | C <sub>24</sub> H <sub>30</sub> N <sub>2</sub> O <sub>5</sub> | 427,2227                           | 427,2227                         | 0.11                   |
| desacetoxyvindoline   | C <sub>23</sub> H <sub>30</sub> N <sub>2</sub> O <sub>4</sub> | 399,2278                           | 399,2280                         | 0.42                   |
| deacetylvindoline     | C <sub>23</sub> H <sub>30</sub> N <sub>2</sub> O <sub>5</sub> | 415,2227                           | 415,2229                         | 0.36                   |

**Supplemental Table 2.** Measured masses of the intermediates of vindoline/vindorosine biosynthetic pathways. Tabersonine and vindoline were identified according to standards.

**Supplemental Table 3.** Primers used in this study.

Primers annotated T16H and 2T16H were used for amplification of the CYP71D12 and CYP71D351 sequences, respectively. “q” primers were used for qPCR.

| Primers         | Sequence                                 | Application                                                       |
|-----------------|------------------------------------------|-------------------------------------------------------------------|
| T16H-BglII      | GCAGATCTGATGGAATTCTATTATTTTCTCTACTTGGCC  | <i>cDNA cloning</i>                                               |
| T16H-SpeI       | GCACTAGTAGCAGGAGAAGAGGAAGAAAAATTA        |                                                                   |
| CrT16H-RT01     | GCTTCATCCACCAGTTCCAT                     |                                                                   |
| CrT16H-RT02     | CCGGACATATCCTTCTTCCA                     |                                                                   |
| 2T16H-A         | AAGAGAATGGGGAACAAAACAAGGATC              |                                                                   |
| 2T16H-51        | ATACCTTTCTTACCTCTTCTTGTC                 |                                                                   |
| 2T16H-52        | CACTGTCGTTGACGATGTCTCAGTT                |                                                                   |
| 2T16H-YFPfor    | GCAGATCTATGGAGTTGTATTATTTTCCACCTTTGC     | <i>Full length ORF cloning , YFP fusion construct- riboprobes</i> |
| 2T16H-YFPrev    | GCACTAGTATATTTACCTTTGAGAGAAGAAGCAGAAT    |                                                                   |
| T16H-BglII      | GCAGATCTGATGGAATTCTATTATTTTCTCTACTTGGCC  | <i>Yeast expression</i>                                           |
| T16H-Bgl2stop   | GCAGATCTCAAGCAGGAGAAGAGGAAGAAAAATTA      |                                                                   |
| 2T16H-Bgl2-stop | GCAGATCTCTAATATTTACCTTTGAGAGAAGAAGCAGAAT |                                                                   |
| qT16H-up        | GCCAAAAACGCCAATATTCAAACC                 | <i>qPCR analysis in periwinkle organs and cultivars</i>           |
| qT16H-down      | ATGTGATGAGTATGGCCACCGC                   |                                                                   |
| q2T16H-up       | GATCAACTCACAGTGGCAGTC                    |                                                                   |
| q2T16H-down     | GACTTGAGGACTTGTGATTGGC                   |                                                                   |
| qG10H-for       | CATTATTAGGCGACCAACC                      |                                                                   |
| qG10H-rev       | GAACTTCTTTCGCCATTGTT                     |                                                                   |
| qOMT-for        | AATGGGCATTTCTCTTAAGGA                    |                                                                   |
| qOMT-rev        | CCGTAATACAAATTGGGTACAA                   |                                                                   |
| qNMT-for        | GGCTATCAACCTTATAAATGCA                   |                                                                   |
| qNMT-rev        | ATCTTCCGAACGGAATTTAACT                   |                                                                   |
| qDAT-for2       | GGTTCAATTTATTTCTCACGTAC                  |                                                                   |
| qDAT-rev2       | AACTATCAGAAAGGTAAGCATCGA                 |                                                                   |
| qD4H-for        | ATAGTTAATCATGGGATTCCACAAGATGTT           |                                                                   |
| qD4H-rev        | GTTTCATGAAACTTACGAACTCCATCTAC            |                                                                   |
| qMAT-for        | GATACTGTCAATATCGAACAGG                   |                                                                   |
| qMAT-rev        | GATGTCAACGTTTTCCATATCG                   |                                                                   |
| qRPS9-for       | TTACAAGTCCCTTCGGTGGT                     |                                                                   |
| qRSP9-rev       | TGCTTATTCTTCATCCTCTTCATC                 |                                                                   |
| qR60S-for       | TCTTAGTTGGAATGTTTCAGCACCTG               |                                                                   |
| qR60S-rev       | TCTTAGTTGGAATGTTTCAGCACCTG               |                                                                   |
| 2T16H fw        | TGATTGGAAACTTGCCAGTGATGA                 | <i>VIGS constructs</i>                                            |
| 2T16H rev       | ATGGATTAGCAACGAAATCTTCCGTA               |                                                                   |
| q2T16H fw       | GATCAACTCACAGTGGCAGTC                    | <i>qPCR in silenced plants</i>                                    |
| q2T16H rev      | GACTTGAGGACTTGTGATTGGC                   |                                                                   |

|           |                                                               |      |
|-----------|---------------------------------------------------------------|------|
| CYP71D12  | .....ATGGAATTCTATTATTTCTCTACTTGGC                             | 1    |
| CYP71D351 | AGGCTTGATTTTGGTCAACTTTCTCTACCTCATGGAGTTGTATTATTTTCCACCTTTGC   | 1    |
| CYP71D12  | CTTCCTTCTTTCTGCTTCATTTTATCAAAAACCACAAAGAAATTTGGCCAAAACAGCCA   | 30   |
| CYP71D351 | CTTCCTTCTTTCTGCTTCATTTTAGCCAAAACCTCTAAAGAAATCTGGCCAATCAAATCT  | 61   |
| CYP71D12  | ATATTCAAACCATGATGAGCTACCTCCGGGGCTCCCCAAATTCCTATATTAGGAAATGC   | 90   |
| CYP71D351 | TA.....AGCTGCCTCTGGGGCTCCCCAATTCCTATATTAGGAAATGC              | 121  |
| CYP71D12  | CCATCAACTTAGCGGTGGCCATACTCATCACATTC TAAGAGATTTGGCCAAAAATATGG  | 150  |
| CYP71D351 | CCATCAACTTATAGGTGGCCATACTCATCACATTC TAAGAGATTTGGCCAAAAATATGG  | 166  |
| CYP71D12  | GCCGTTGATGCACCTAAAGATTGGTGAAGTTCAACCATTGTTGCATCTCACCACAAAT    | 210  |
| CYP71D351 | ACCGTTGATGCACCTAAAGACTGGTGAAGTTCAACCATTGTTGCATCCTCACCAGAAAT   | 226  |
| CYP71D12  | TGCTGAAGAGATTTT TAGAACGCATGATATTCTTTTGCCGATAGACCCTCAAATCTTGA  | 270  |
| CYP71D351 | TGCTGAAGAGATGTTTAAACACATGATGTTCTCTTTGCCGACAGACCCTCAAATATTGT   | 286  |
| CYP71D12  | GTCTTTTAAATCGTGTCTTATGATTTTTCAGATATGGTTGTTAGTCCATATGGTAATTA   | 330  |
| CYP71D351 | TGCCTTCAAATCTTGTCTTATGATTTTTCAGATATGGTTGTTAGTCCATATGGCAATTA   | 346  |
| CYP71D12  | TTGGAGACAACCTTCGTAAAATTAGCATGATGGAACCTCTTAGCCAAAAGAGTGTCCAATC | 390  |
| CYP71D351 | TTGGAGACAACCTTCGTAAAATTAGCATGATGAGACTTTTAGCCAAAAGAGTGTCCAATC  | 406  |
| CYP71D12  | TTTTAGATCAATTAGAGAAGAGGAAGTATTAATTTTATTAATCAATTGGTTCCAAGA     | 450  |
| CYP71D351 | TTTTAGATCAATTAGAGAAGAGGAAGTATTAATTTTATTAATCAATTGGTTCCGAGAGA   | 466  |
| CYP71D12  | GGGTACAAGAATTAATCTCAGCAAAGAGATATCGTTACTTATTTATGGAATTACTACGGC  | 510  |
| CYP71D351 | GGGTACAAAAATTAATCTTAGCAAGGAAATATCGTTACTTATTTATGGAATTACTACGGC  | 526  |
| CYP71D12  | TGCTGCTTTTGGAGAGAAAAATAAGAATACAGAAGATTTATTCGTCCTTCTTGATCAACT  | 570  |
| CYP71D351 | TGCTGCTTTTGGAGAAAAATAAGAATACAGAAGATTTATTCGTCCTTCTTGATCAACT    | 586  |
| CYP71D12  | TACAAAGGCAGTAGCGGAACCTAACATTGCAGATATGTTCCCTTCTCTCAAATTTCTTCA  | 630  |
| CYP71D351 | CACAGTGGCAGTCGCGGAACCTAACATTGCAGATATGTTCCCTCTATCAATTTCTTAA    | 646  |
| CYP71D12  | ATTGATTAGTACATCAAAATATAAGATTGAGAAAAACACAAACAATTTGATGTTATAGT   | 690  |
| CYP71D351 | ATTAATTAGTAGATCGAAATATAAGATTGAGAAAAACACAAAAATTTGATGCCATAGT    | 706  |
| CYP71D12  | TGAAACTATTCTCAAAGGCATAAGGAGAAAAATCA.....ACAAGCCCTTAAGTC...A   | 750  |
| CYP71D351 | TCAAACTATTCTCAACCATCATAAGGATAGATTAGCCAATCACAAGTCTCAAGTCATGA   | 766  |
| CYP71D12  | AGAGAATGGAGAAAAAAGGAGGACCTTGTGATGTGCTACTCAATATTCAACGACGTAA    | 801  |
| CYP71D351 | AGAGAATGGGGAACAAAACAAGGATCTTGTGATGTGCTACTCAATATTCAACAACGTGG   | 826  |
| CYP71D12  | TGACTTTGAAGCCCCACTGGGGGATAAAAACATCAAAGCCATAATCTTCAACATATTAG   | 861  |
| CYP71D351 | TGATTTTGATACACCCTAGGTGATCGCAGCGTCAAAGCAGTAATTTTAAACATATTAG    | 886  |
| CYP71D12  | TGCCGGCACTGAGACATCGTCAACAACAGTCGATTGGGCAATGTGCGAAATGATAAAAAA  | 921  |
| CYP71D351 | TGCCGGCACTGAGACATCGTCAACGACAGTGGATTGGGCCATGTGTGAAATGATAAAAAA  | 946  |
| CYP71D12  | TCCAACGGTAATGAAAAAGGCACAAGAAGAGGTAAGAAAGGTATTTAATGAAGAAGGAAA  | 981  |
| CYP71D351 | TCCAACGATAATGAAAAAGGCACAAGAAGAGGTAAGAAAGGTATATAATGAAGAAGGAAA  | 1006 |

|           |                                                                |      |
|-----------|----------------------------------------------------------------|------|
| CYP71D12  | TGTTGATGAAACAAAACCTTCATCAACTAAAATATTTACAAGCAGTGATTAAGAAACATT   | 1041 |
| CYP71D351 | TGTTAATGAAACAAAACCTTCATCAGCTAAAATATTTAAAAGCAGTGATTAAGAAACATT   | 1066 |
| CYP71D12  | AAGGCTTCATCCACCAGTTCCATTACTACTTCCAAGAGAATGTCGAGAACAATGTAAGAT   | 1101 |
| CYP71D351 | AAGGCTTCATCCACCAGTTCCATTACTACTTCCAAGAGAATGTCGAGAACAATGTTGAGAT  | 1126 |
|           | <i>CrT16H-RT01</i> →                                           |      |
| CYP71D12  | TAAAGGGTACACAATACCATCCAAATCTAGAGTTATAGTCAATGCATGGGCTATCGGAAG   | 1161 |
| CYP71D351 | TAAAGGGTACACAATACCATCCAAATCTAGAGTTATAGTCAATGCATGGGCTATCGGAAG   | 1186 |
| CYP71D12  | GGATCCAAATTACTGGATTGAACCTGAGAAATTTAACCCGGATAGATTTCTTGAATCAAA   | 1221 |
| CYP71D351 | GGATCCGAATTACTGGATTGAACCTGAAAATTTAACCCGGAGAGATTTCTTGAATCAGA    | 1246 |
|           | ← <i>CrT16H-RT02</i>                                           |      |
| CYP71D12  | AGTTGATTTTAAAGGAAATTCATTTCGAGTATCTACCATTTGGTGGTGGGAAGAAGGATATG | 1281 |
| CYP71D351 | AGTTGATTTTAAAGGAAACTCATTCGAGTATCTGCCGTTTGGTGGTGGGAAGAAGGATATG  | 1306 |
| CYP71D12  | TCCGGGCATAACATTTGCTTTGGCTAATATAGAATTGCCATTAGCACAACTTTTGTCCA    | 1341 |
| CYP71D351 | TCCGGGCATAACATTTGCTTTGGCTAATATAGAACTGCCATTAGCACAACTTTTGTCCA    | 1366 |
| CYP71D12  | TTTTGATTGGCAAT.....CAAATACTGAGAAATTAATATGAAAGAGAG              | 1401 |
| CYP71D351 | TTTTGATTGGAAACTTGCCAGTGATGAAACAAATATTGATAAATTAGACATGACGGAGAG   | 1426 |
| CYP71D12  | TAGAGGGGTAACAGTTAGGCGAGAAGATGATTTGTATTTGACTCCAGTTAATTTTCTTC    | 1446 |
| CYP71D351 | TAGAGGGGTAACAGTTAGAAGAGAAGATGATTTGTGTCTGATCCATTTTCCTTATCTGTC   | 1486 |
| CYP71D12  | CTCTTCTCTGCTTGAAAATCTTTACCG.....AAACAATTCAAGACATG.             | 1506 |
| CYP71D351 | TTCTTCTCTCAAAGGTAAATATTAGATGGAGACAACATCACCAAATAATTGAAGACCAAG   | 1546 |
| CYP71D12  | ...GTAGTCCATGAAGGATTTTTTTTTTTTTTTCTTTCTTCCTTTTCTTACGAGAAGTCC   | 1551 |
| CYP71D351 | ATTGTAGGTCATGAATAGTTGTTCGGTCAAGAAATGGTGGCAAAAATTGCTACGGGAAGATT | 1606 |
| CYP71D12  | ATGAAGGATTAAGTTTGTGGATTGTTAGTTTGCCTTTGGTAACAAGTTTGTGGATTGTT    | 1608 |
| CYP71D351 | TCGTTGCTAATCCAT.....TGTAATTTTTT                                | 1666 |
| CYP71D12  | TTGTATCTAAATGAATAAAGCAATGATTGCCTCATCAAAAAAAA                   | 1668 |
| CYP71D351 | TTGTATA.....                                                   | 1692 |

**Supplemental Figure 1.** Nucleic acid sequence alignment of *CYP71D12* and *CYP71D351*. Arrows designated the primers used for amplification of the partial *CYP71D351* or *CYP71D12* cDNAs. Initiation and termination codons are indicated by blue and pink highlighting, respectively. The yellow highlighting delimits the silencing fragment used in VIGS assays. All other regions of the coding sequences display high identity leading to the production of identical 21 to 23 mers siRNA. A single 23 mers siRNA (red bar) is common to the *CYP71D12* and the *CYP71D351* selected region.

```

CYP71D351 1 MELYYFSTFAFLLCFILAAKTLKKSGGSS-----NLKLEPLGPPPIPILGNAHQIIGGHTHHILRDLAKKYGPLMHLKTGEV
CYP71D12 1 MEFYYFLYLAFLLCFILSKTKKFGONSQYSNHDELPPGPPQIPILGNAHQISGGHTHHILRDLAKKYGPLMHLKIGEV

CYP71D351 76 STIVASSPEIAEENFKTHDVLFADRPSNIVAFKILSYDMSDVISPYGNYWRQLRKISMMELFSQRSVQSFRSIREEEVL
CYP71D12 81 STIVASSPQIAEENFRTHDILFADRPSNLESFKIVSYDFSDMVVISPYGNYWRQLRKISMMELLSQRSVQSFRSIREEEVL

CYP71D351 156 NFIKSIGSREGTRINLSKEISLLIYGITTRAAFGEKNKNTEEFIRLLDQLTVAVAEPNIADMFPSINFLKLISRSSKYKIE
CYP71D12 161 NFIKSIGSREGTRINLSKEISLLIYGITTRAAFGEKNKNTEEFIRLLDQLTKAVAEPNIADMFPSIKFLQLISTSKYKIE

CYP71D351 236 KIHKNFDALVQTILNNHKKDRLANHKSSSSEENGEQNKDLVDVLLNIQQRGDFDTPLGDRSVKALIFNIFSAGTETSSTTV
CYP71D12 241 KIHKCFDVIVETILLKGHKEKINKPLS---QENGEKKEDLVDVLLNIQRRNDFEAPLGDANIKALIFNIFSAGTETSSTTV

CYP71D351 316 DWAMCEMIKNPTIMKKAQEEVRKVNEEGNVNETKLHQLKYLKAVIKETLRLHPPVPLLLPRECREQCETIKGYTIPSKSR
CYP71D12 318 DWAMCEMIKNPTIMKKAQEEVRKVNEEGNVNETKLHQLKYLQAVIKETLRLHPPVPLLLPRECREQCETIKGYTIPSKSR

CYP71D351 396 VIVNAWAIGRDPNYWIEPENFNFPRFLESEVDFKGNSFEYLPFGGRRICPGITFALANIELPLAQLLFHFDWKLASDET
CYP71D12 398 VIVNAWAIGRDPNYWIEPEKFNPRFLESKVDFKGNSFEYLPFGGRRICPGITFALANIELPLAQLLFHFDW-----QS

CYP71D351 476 NIKKLDMTESRGVTVRREDDLCLIPFPSSASSLKGKY
CYP71D12 473 NTEKLNMTESRGVTVRREDDLCLIPVNSSSSPA---

```

**Supplemental Figure 2.** Amino-acid sequence alignment of CYP71D351 and CYP71D12. Sequence identity and similarity are highlighted by black and grey shading, respectively. Red bars denote the position of the predicted transmembrane helix as described in Guirimand *et al.*, (2009).

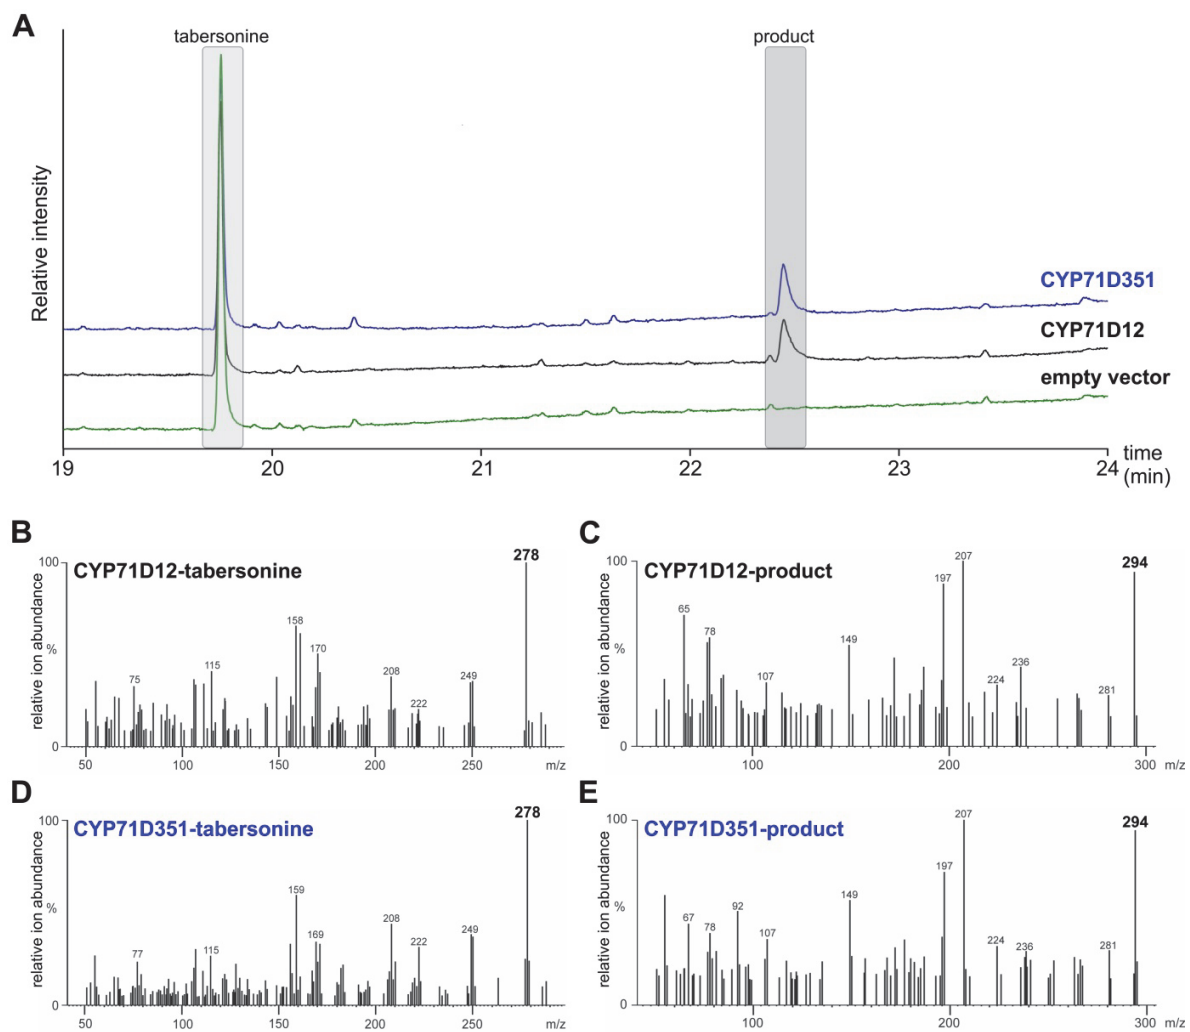

**Supplemental Figure 3.** Characterization of the reaction product of CYP71D351, CYP71D12 and empty vector yeast microsomes incubated with tabersonine (100  $\mu$ M) and NADPH (600  $\mu$ M). (A) GC chromatograms and (B-E) corresponding MS spectra of tabersonine and reaction product.

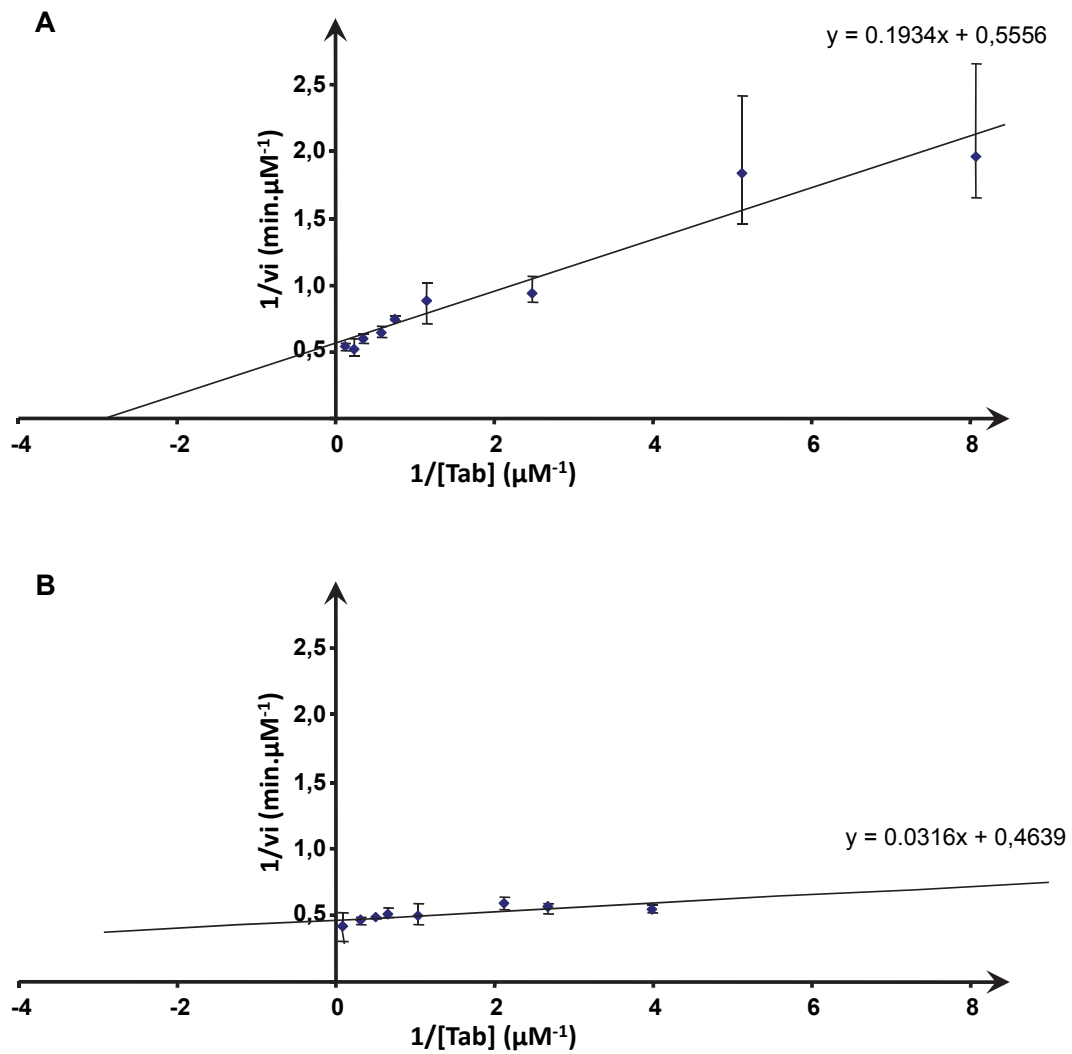

**Supplemental Figure 4.** Effect of tabersonine concentration on T16H activity of CYP71D12 (A) and CYP71D351 (B). Lineweaver-Burk plots ( $[\text{NADPH}] = 1\text{mM}$ ).



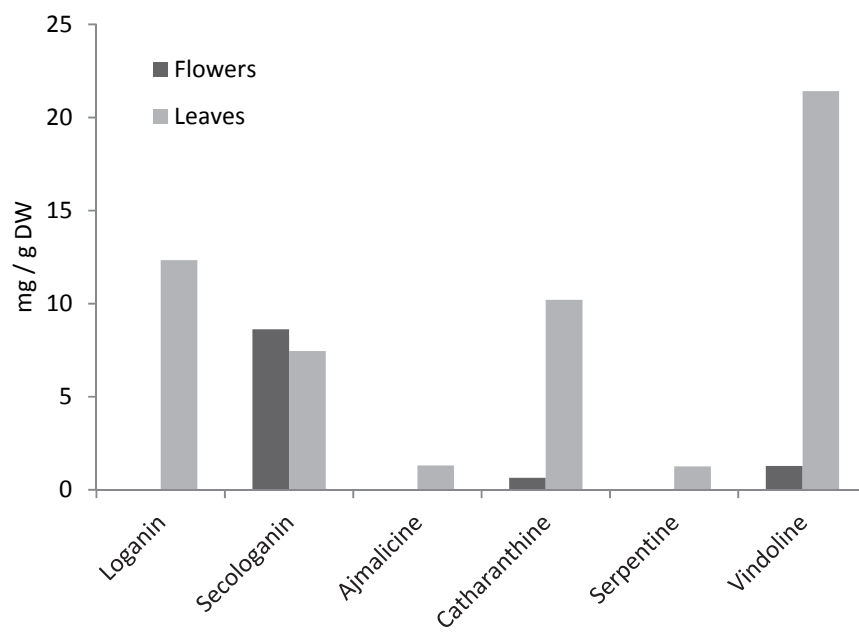

**Supplemental Figure 5.** HPLC comparative analysis of MIAs accumulation in flowers (dark grey) and young leaves (light grey) of *C. roseus* (Pacifica Pink cultivar) according to Guirimand et al. (2010).

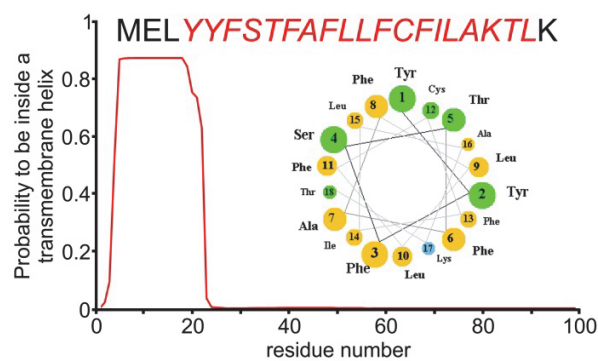

**Supplemental Figure 6.** Detection of a putative transmembrane helix at the N-terminal end of CYP71D351 (T16H2). The probability of a residue to be inside a transmembrane helix has been calculated for the 100-first residues of CYP71D351 with a Markov model by the TMHMM server (<http://www.cbs.dtu.dk/services/TMHMM/>). The inset shows the predicted sequence of the transmembrane helix and a projection of the predicted helical wheel represented as a cross sectional view of the axis using a device available at (<http://cti.itc.virginia.edu/~cmg/Demo/wheel/wheelApp.html>). Non polar, polar and basic residues are represented in yellow, green and blue, respectively.
